# Supplementary material
Source: Springer Nature journal article supplement (https://www.springermedizin.de/resource/supplementary/12943_2014_1320_MOESM10_ESM.pdf/9552714)

A)

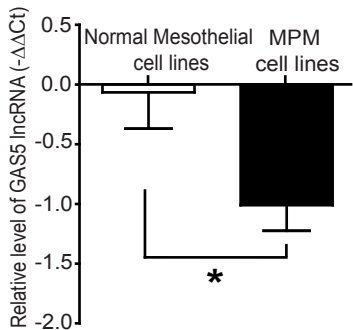

B)

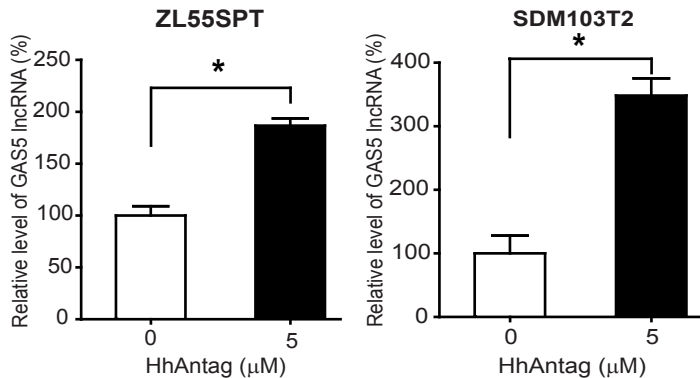

C)

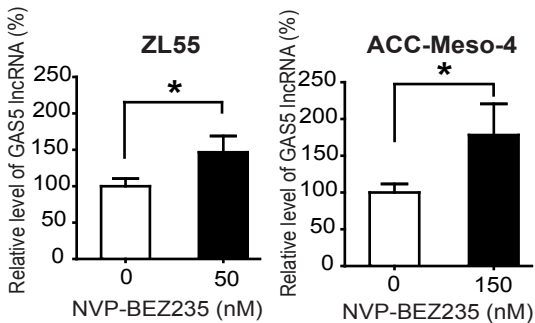

D)

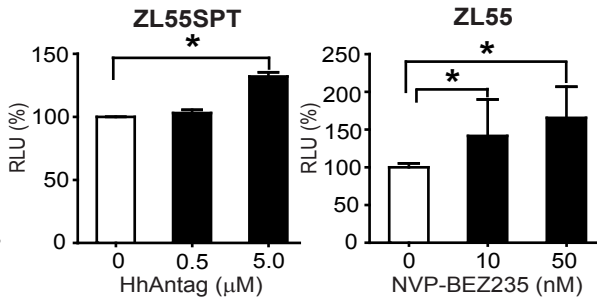

Supplement: MOESM10 [file 9552714]
